# Supplementary material
Source: Research Square preprint supplement (doi:10.21203/rs.3.rs-9212433/v1)
Supplement: Supplementary file 1 [file 1e1b6576fa1337e4cc9d52a3.docx]

**Online Resource 1 and 2 — Administrative Burden Data**

*Iannopollo M, Ricasoli M, Maragna V, et al. Quantifying the Dual Value and Governance Risks of Early Access Programs in Oncology: A Single-Centre Analysis and National Policy Framework. European Journal of Health Economics. Corresponding author: Mauro Iannopollo, MD, SOC Medical Oncology, AUSL Toscana Centro — Pistoia and Pescia Hospitals, Pistoia, Italy. mauro.iannopollo@uslcentro.toscana.it*

These Online Resources provide detailed administrative burden data referenced in the main manuscript.

**Online Resource 1.** Discrete administrative activities per EAP/NPP programme. Time estimates based on documented workflow analysis. ICF informed consent form; CE Ethics Committee. Resupply cycles calculated at q8–12 weeks; foreign drug programmes require additional Nulla Osta Sanitario (NOS) from the Italian Ministry of Health.

| **Activity** | **Phase** | **Who** | **Time (min)** | **Occurrences** | **Notes** |
| --- | --- | --- | --- | --- | --- |
| Clinical report for gratuity letter | Activation | Oncologist | 60 | Once per programme | Individual patient justification |
| Receipt and filing of gratuity letter | Activation | Pharmacist | 15 | Once per programme | Archiving + company communication |
| Clinical report for Ethics Committee | Activation | Oncologist | 90 | Once per programme | Formal CE submission document |
| Specific informed consent drafting | Activation | Oncologist/pharmacist | 45 | Once per programme | Drug-specific, not standard ICF |
| CE session preparation and attendance | Activation | Oncologist | 60 | Once per programme | Presentation + deliberation time |
| Receipt of CE opinion | Activation | Pharmacist | 15 | Once per programme | Filing + transmission |
| Transmission of CE opinion to company | Activation | Pharmacist | 20 | Once per programme | Prerequisite for first supply |
| SUBTOTAL — Activation |  |  | **305 min (5.1 h)** | Per programme |  |
| Resupply request (per patient) | Recurring | Pharmacist | 20 | Every 8–12 wks | Per patient individually |
| Drug receipt and pharmacy registration | Recurring | Pharmacist | 25 | Every 8–12 wks | EAP drugs tracked separately |
| Separate storage management | Recurring | Pharmacist | 10 | Every 8–12 wks | Isolated from commercial stock |
| Ward distribution | Recurring | Pharmacist/nurse | 15 | Every 8–12 wks | Traceability documentation |
| SUBTOTAL — Resupply per patient-cycle |  |  | **70 min (1.2 h)** | Every 8–12 wks per patient |  |
| Nulla Osta Sanitario (import only) | Activation + recurring | Pharmacist | 120 (2.0 h) | Once per programme + once per resupply cycle (foreign drugs only) | Ministry of Health clearance |

**Online Resource 2.** Total administrative burden by EAP/NPP programme, AUSL Toscana Centro 2025. Activity times are based on documented workflow analysis (Online Resource 1). Resupply cycles calculated at q8–12 week intervals per patient. FTE full-time equivalent; NOS Nulla Osta Sanitario; ROI return on investment calculated as gross ex-factory drug-cost saving (€761,728) divided by estimated annual administrative cost (€4,540).

| **Programme** | **Drug** | **Pts** | **Resupply cycles** | **Foreign drug** | **Activation (h)** | **Resupply (h)** | **NOS (h)** | **Total (h)** |
| --- | --- | --- | --- | --- | --- | --- | --- | --- |
| NPP (Daiichi-Sankyo) | T-DXd | 2 | 3 | No | 5.1 | 7.0 | — | 12.1 |
| EAP ADRIATIC (AstraZeneca) | Durvalumab | 1 | 4 | No | 5.1 | 4.7 | — | 9.8 |
| EAP MATTERHORN (AstraZeneca) | Durvalumab | 1 | 4 | No | 5.1 | 4.7 | — | 9.8 |
| NPP (Astellas/MSD) | Pembro + EV | 1 | 4 | No | 5.1 | 4.7 | — | 9.8 |
| EAP NATALEE (Novartis) | Ribociclib | 10 | 3 | No | 5.1 | 35.0 | — | 40.1 |
| EAP PAPILLON (Janssen) | Amivantamab | 2 | 3 | Yes | 5.1 | 7.0 | 14.0 | 26.1 |
| EAP AEGEAN (AstraZeneca) | Durvalumab | 2 | 4 | No | 5.1 | 9.3 | — | 14.4 |
| EAP RUBY (GSK) | Dostarlimab | 1 | 4 | No | 5.1 | 4.7 | — | 9.8 |
| NPP Sevabertinib (Bayer) | Sevabertinib | 1 | 3 | Yes | 5.1 | 3.5 | 8.0 | 16.6 |
| NPP Repotrectinib (BMS) | Repotrectinib | 1 | 3 | Yes | 5.1 | 3.5 | 8.0 | 16.6 |
| EAP Zolbetuximab (Astellas) | Zolbetuximab | 1 | 3 | Yes | 5.1 | 3.5 | 8.0 | 16.6 |
| **TOTAL (11 programmes)** |  | **23** |  |  | **56.1** | **87.6** | **38.0** | **181.7** |
| **FTE equivalent (1,600 h/year)** |  |  |  |  |  |  |  | **0.114 FTE** |
| Estimated annual cost (€40,000 FTE) |  |  |  |  |  |  |  | ~€4,540 |
| **ROI (drug-cost saving / admin cost)** |  |  |  |  |  |  |  | **168:1** |
